# Supplementary material for: Signatures of single quantum dots in graphene nanoribbons within the quantum Hall regime
Source: Royal Society of Chemistry journal article supplement (doi:10.1039/c6nr00187d), 2016-01-01
Supplement: c6nr00187d1.pdf [file c6nr00187d1.pdf]

# Supplementary Information

for

## Signatures of single quantum dots in graphene nanoribbons within the quantum Hall regime

Endre Tóvári,<sup>a</sup> Péter Makk,<sup>b</sup> Peter Rickhaus,<sup>b</sup> Christian Schönenberger,<sup>b</sup> and Szabolcs Csonka<sup>a\*</sup>

### 1 Device geometry

The nanoribbons were fabricated by depositing a graphene flake over a bottom gate structure, then etching longitudinal edges and a hole in the center of the flake using reactive ion etching, before suspension. Fig. S1 shows an SEM image of a final double-ribbon structure. Two bottom gates - situated below the suspended branches and contacts - are schematically drawn in yellow. Conductance measurements as a function of the two gate voltages revealed that one branch was often dead in such devices. All measurements were performed in junctions with only one conducting branch.

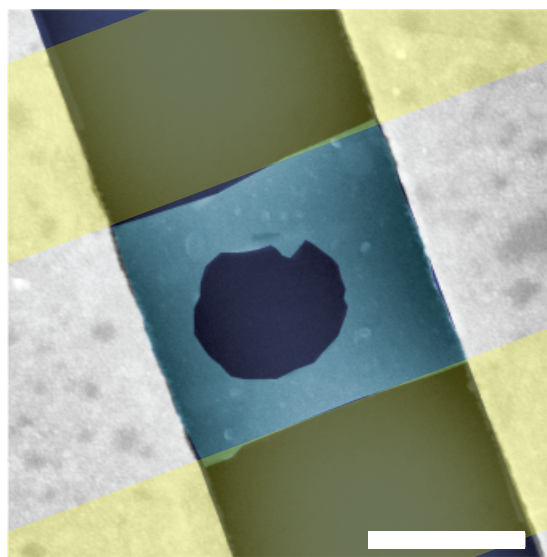

Figure S1: SEM image of a flake with a hole etched in the middle, from Ref. S 1. Bottom gates are drawn in yellow. Scale bar is 500 nm.

### 2 Coulomb diamonds on R1

$V_{SD} - V_g$  measurements at constant magnetic fields have also been performed on R1. Fig. S2 depicts Coulomb-diamonds at 4 T, belonging to conductance fluctuations near the gap edge.

<sup>0a</sup> Department of Physics, Budapest University of Technology and Economics, and Condensed Matter Research Group of the Hungarian Academy of Sciences, Budafoki út 8, 1111 Budapest, Hungary.

<sup>0\*</sup> E-mail: csonka@mono.eik.bme.hu

<sup>0b</sup> Department of Physics, University of Basel, Klingelbergstrasse 82, CH-4056 Basel, Switzerland.

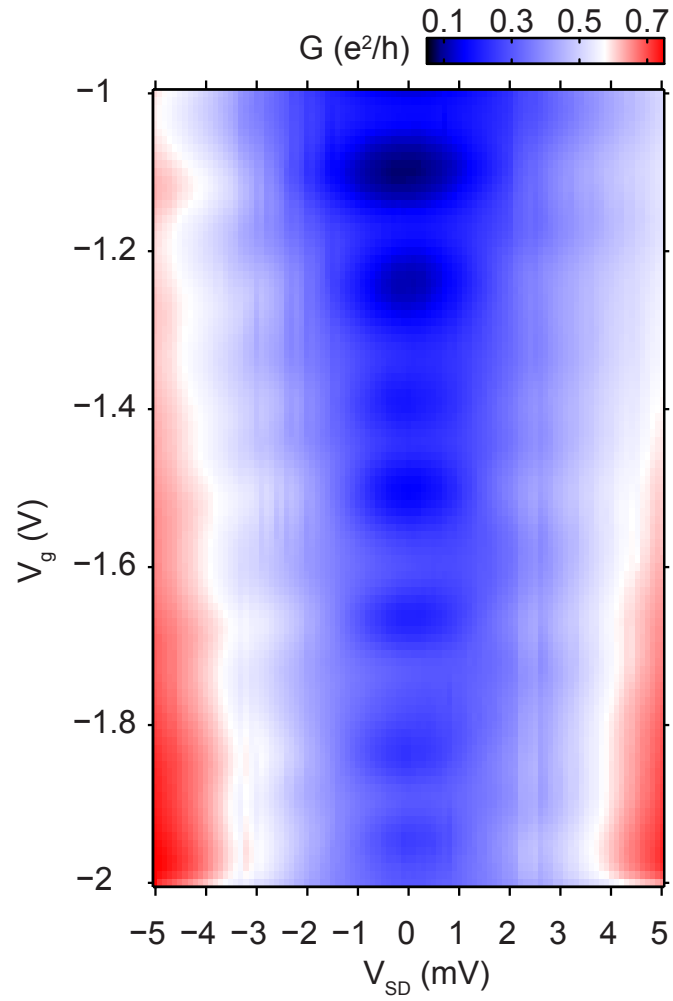

Figure S2: Conductance  $G$  of ribbon R1 at 4 T as a function of bias voltage  $V_{SD}$  and gate voltage  $V_g$ , exhibiting Coulomb-diamonds.

## References

- [1] R. Maurand, P. Rickhaus, P. Makk, S. Hess, E. Tovari, C. Handschin, M. Weiss and C. Schönenberger, *Carbon*, 2014, **79**, 486–492.
